# Supplementary material for: Comment on “Efficacy of ginseng and its ingredients as adjuvants to chemotherapy in non-small cell lung cancer” by H. Zhu, H. Liu, J. H. Zhu, S. Y. Wang, S. S. Zhou, M. Kong, Q. Mao, F. Long, Z. J. Fang and S.-L. Li, Food Funct., 2021, 12, 2225
Source: Royal Society of Chemistry journal article supplement (doi:10.1039/d1fo01914g), 2022-01-01
Supplement: d1fo01914g1.pdf [file d1fo01914g1.pdf]

**(A) ORR (Type of ginseng and its ingredients)**

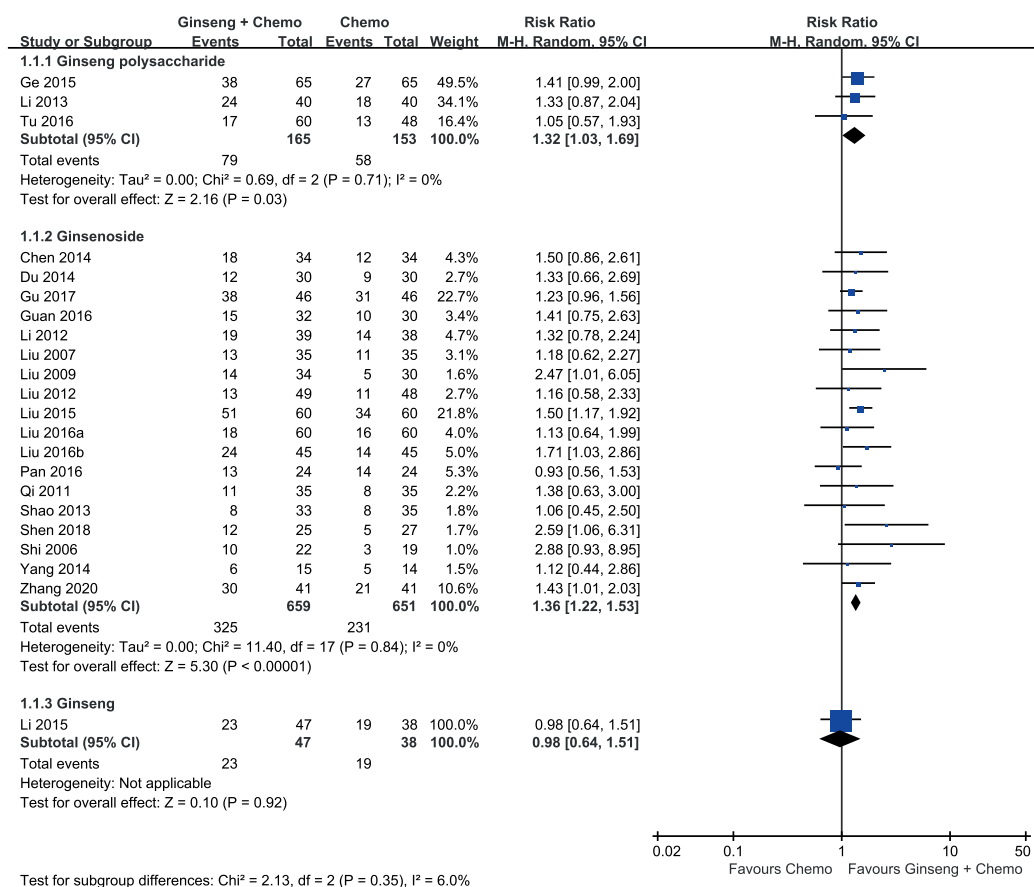

**(B) ORR (Type of chemotherapy)**

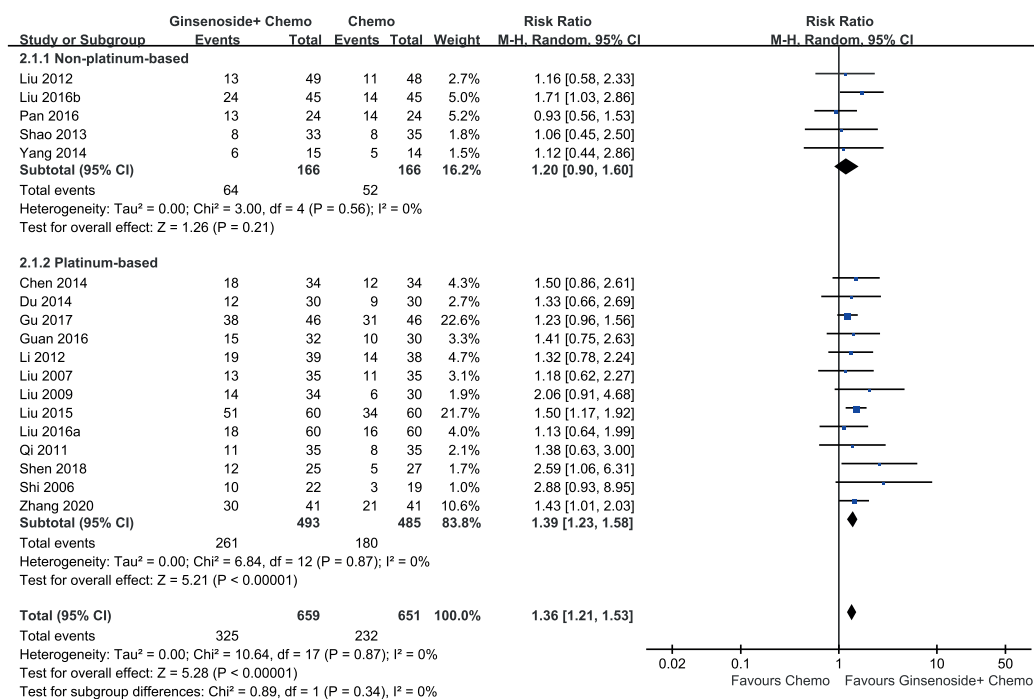

**Supplementary 1.** Forest plots of objective response rate (ORR) for subgroups: (A) types of ginseng and its ingredients, (B) types of chemotherapy

### (A) DCR (Type of ginseng and its ingredients)

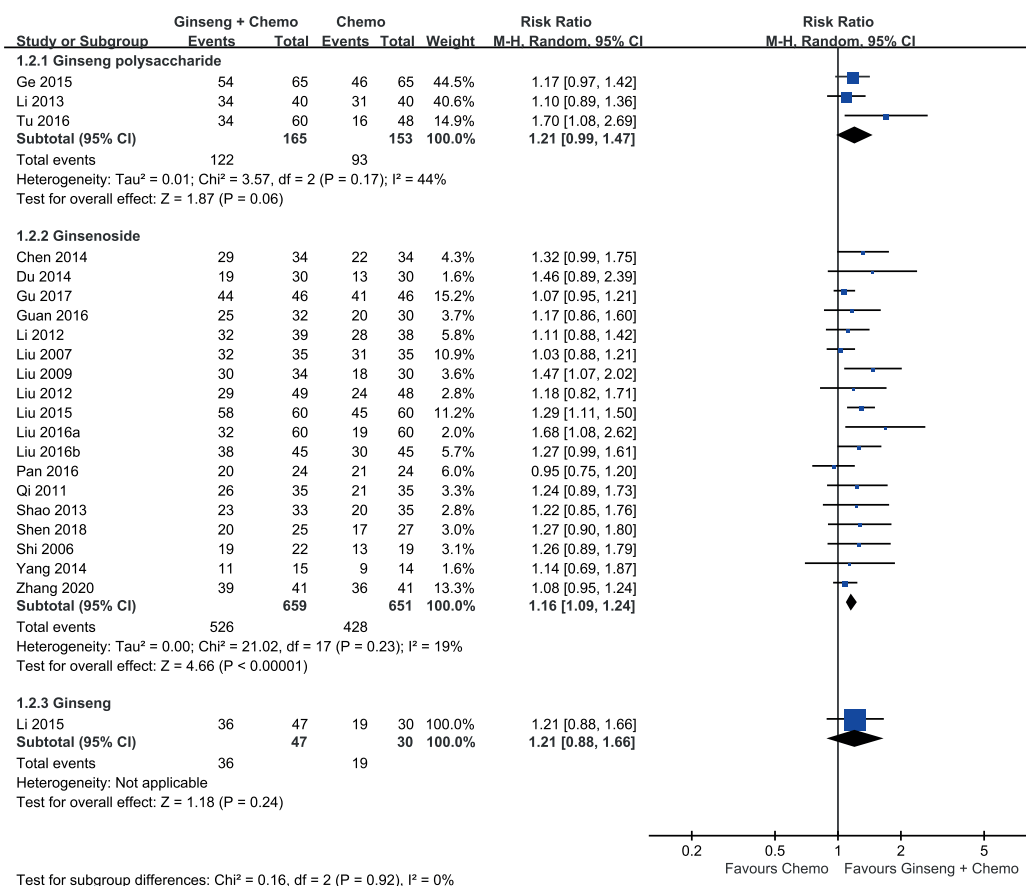

### (B) DCR (Type of chemotherapy)

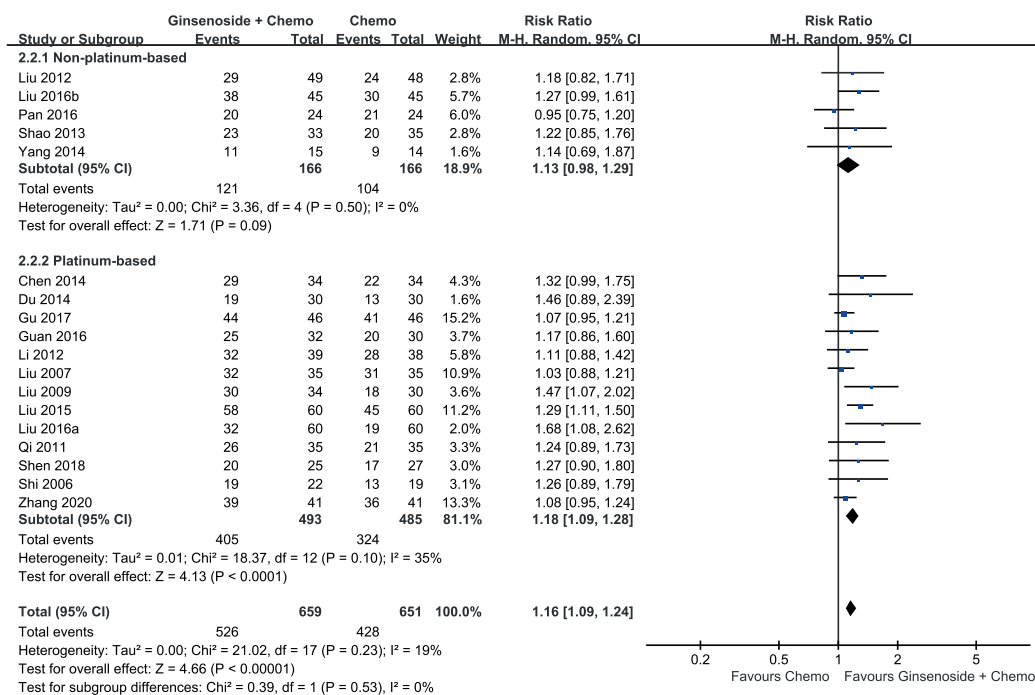

**Supplementary 2.** Forest plots of disease control rate (DCR) for subgroups: (A) types of ginseng and its ingredients and (B) types of chemotherapy

### (A) KPS (Type of ginseng and its ingredients)

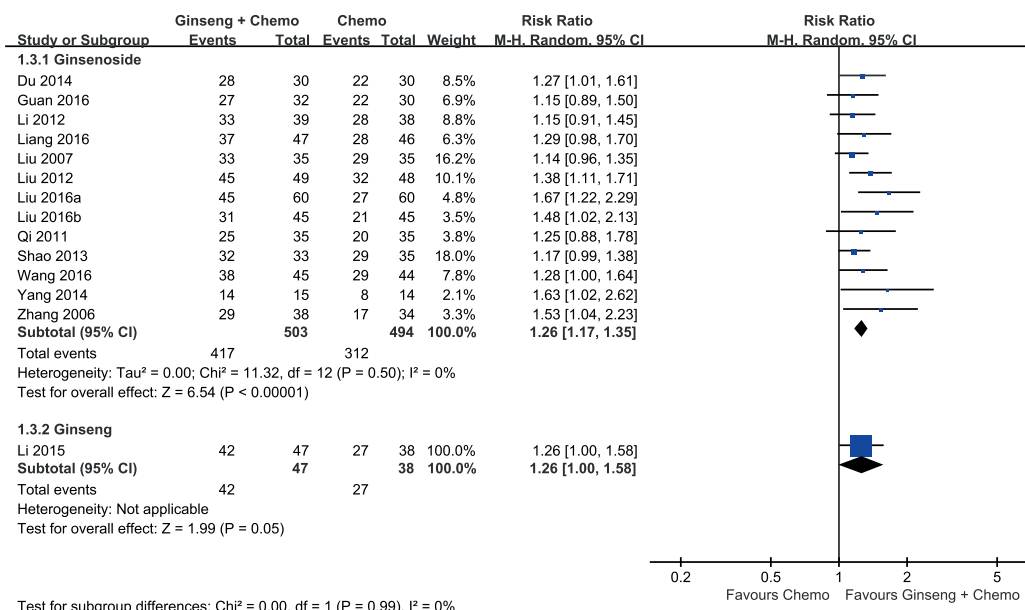

### (B) KPS (Type of chemotherapy)

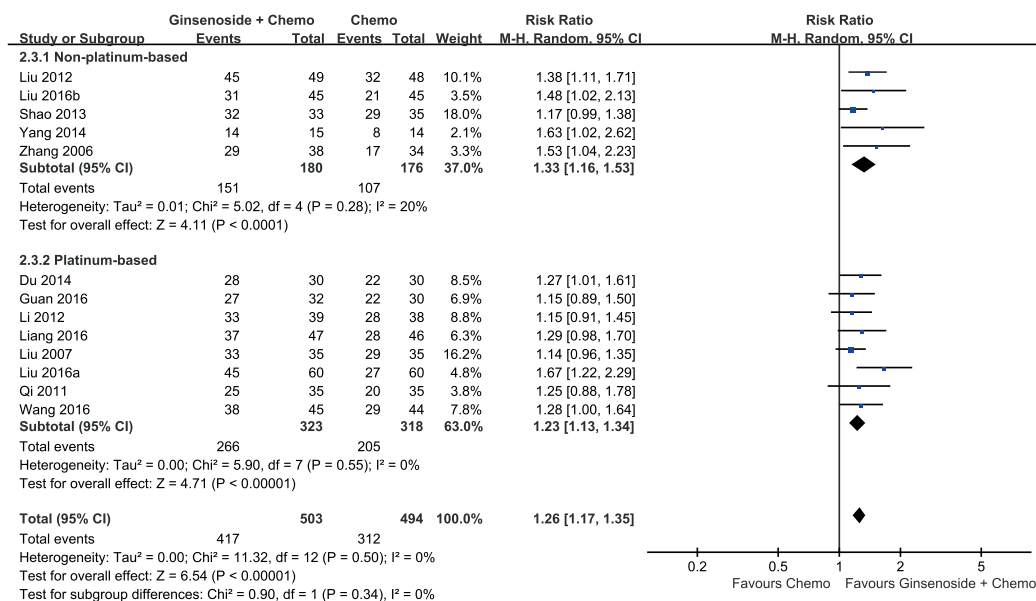

**Supplementary 3.** Forest plots of Karnofsky performance status (KPS) for subgroups: (A) types of ginseng and its ingredients, (B) types of chemotherapy
